# Supplementary material for: Ending an Odyssey? The Psychosocial Experiences of Parents after the Genetic Diagnosis of a Mitochondrial Disease in Children
Source: MDPI journal article supplement (doi:10.3390/jpm14050523), 2024-05-14
Supplement: s1 [file s1]

**Table S1. Semi-structured interview questions**

| Demographic information   | Interview Questions                                                                                                                                                                                                                                                                                                     |
|---------------------------|-------------------------------------------------------------------------------------------------------------------------------------------------------------------------------------------------------------------------------------------------------------------------------------------------------------------------|
| <b>Parent</b>             | <u>Your gender is</u> <input type="checkbox"/> male <input type="checkbox"/> female <input type="checkbox"/> diverse                                                                                                                                                                                                    |
|                           | You are _____ years old                                                                                                                                                                                                                                                                                                 |
|                           | Your highest educational qualification is <input type="checkbox"/> Secondary school<br><input type="checkbox"/> Apprenticeship <input type="checkbox"/> High School (Abitur/Matura) <input type="checkbox"/> University degree                                                                                          |
|                           | Paid working hours/week:                                                                                                                                                                                                                                                                                                |
|                           | Your average monthly income is (gross income)<br><input type="checkbox"/> < 1,000 € <input type="checkbox"/> up to 1,500 € <input type="checkbox"/> up to 2,000€ <input type="checkbox"/> up to 3,000€<br><input type="checkbox"/> up to 4,000€ <input type="checkbox"/> up to 5,000€ <input type="checkbox"/> > 5,000€ |
|                           | You have <input type="checkbox"/> 1 child <input type="checkbox"/> 2 children <input type="checkbox"/> 3 children <input type="checkbox"/> 4 children<br><input type="checkbox"/> > 4 children                                                                                                                          |
| <b>PMD-affected child</b> | Your child is <input type="checkbox"/> male <input type="checkbox"/> female <input type="checkbox"/> diverse                                                                                                                                                                                                            |
|                           | Your child is _____ years old                                                                                                                                                                                                                                                                                           |
|                           | How old was your child when the first symptoms appeared?                                                                                                                                                                                                                                                                |
|                           | How old was your child at diagnosis?                                                                                                                                                                                                                                                                                    |

| Topic                                                               | Interview Questions                                                                                                |
|---------------------------------------------------------------------|--------------------------------------------------------------------------------------------------------------------|
| <b>Diagnosis experience</b>                                         | Did the diagnosis help to classify the symptoms as a disease?                                                      |
|                                                                     | Did the diagnosis change the way you deal with the disease?                                                        |
|                                                                     | Did the diagnosis provide you emotional relief?                                                                    |
|                                                                     | What feelings or thoughts arose for you in the moment of receiving the diagnosis?                                  |
|                                                                     | What else would have been helpful for you in the phase of getting the diagnosis?                                   |
| <b>Daily life and lifestyle after diagnosis</b>                     | Did the diagnosis change the way you structure your everyday life?                                                 |
|                                                                     | Did the division of caregiving responsibilities between parents changed after diagnosis?                           |
|                                                                     | Was it still possible for you to maintain paid employment?                                                         |
|                                                                     | Did the diagnosis impact your financial situation?                                                                 |
|                                                                     | Were there any other changes that resulted from the diagnosis (e.g. vacation planning or your leisure activities)? |
|                                                                     | What else would have been helpful for you in structuring your everyday life?                                       |
| <b>Access to therapeutic supports (i.e. services and equipment)</b> | Did the diagnosis justify for you the need for therapies or eligibility for therapeutic supports?                  |
|                                                                     | Did the diagnosis change your access to therapeutic supports?                                                      |
|                                                                     | Was access to therapeutic supports subsidised as a result of the diagnosis?                                        |

|                                                    |                                                                                                                                 |
|----------------------------------------------------|---------------------------------------------------------------------------------------------------------------------------------|
|                                                    | Which therapies or aids were particularly relieving for you?                                                                    |
|                                                    | What else would have been helpful for you regarding therapeutic supports?                                                       |
| <b>Support groups and other affected families</b>  | Did the diagnosis affect your decision to access to disease-specific support groups or contact with other affected families?    |
|                                                    | Did you find that participation in community support groups or contact with other affected families provided support or relief? |
|                                                    | What topics in the social exchange did you find useful or relieving?                                                            |
|                                                    | What else would have been helpful for you regarding interactions with other affected families or support groups?                |
| <b>Interaction with family members and friends</b> | Did the diagnosis affect interactions within your nuclear family?                                                               |
|                                                    | Did the diagnosis affect interactions with extended family members or friends?                                                  |
|                                                    | Did the diagnosis help you to talk about the disease or to be able to explain it better to others?                              |
|                                                    | Did you find that interactions with family and friends provided support or relief?                                              |
|                                                    | What else would have been helpful regarding interaction with family members and friends?                                        |
| <b>Family planning</b>                             | Did you seek genetic counselling regarding genetic risk for siblings and recurrence risk after diagnosis?                       |
|                                                    | Did the diagnosis change your desire to have more children?                                                                     |
|                                                    | Would you use prenatal genetic diagnosis for an early clarification in a future pregnancy?                                      |
|                                                    | Would you consider an abortion based on prenatal evidence of a mitochondrial disease?                                           |
|                                                    | What else would be helpful for you regarding family planning?                                                                   |
| <b>Closing question</b>                            | What else would have been helpful for you from our clinic?                                                                      |
